# Supplementary material for: Bendamustine plus rituximab in Japanese patients with relapsed or refractory diffuse large B-cell lymphoma
Source: PubMed Central journal article supplement (PMC8993776; doi:10.1007/s00277-022-04801-2), 2022-03-04
Supplement: 277_2022_4801_MOESM1_ESM.pdf [file 277_2022_4801_MOESM1_ESM.pdf]

# Supplementary Figure S1

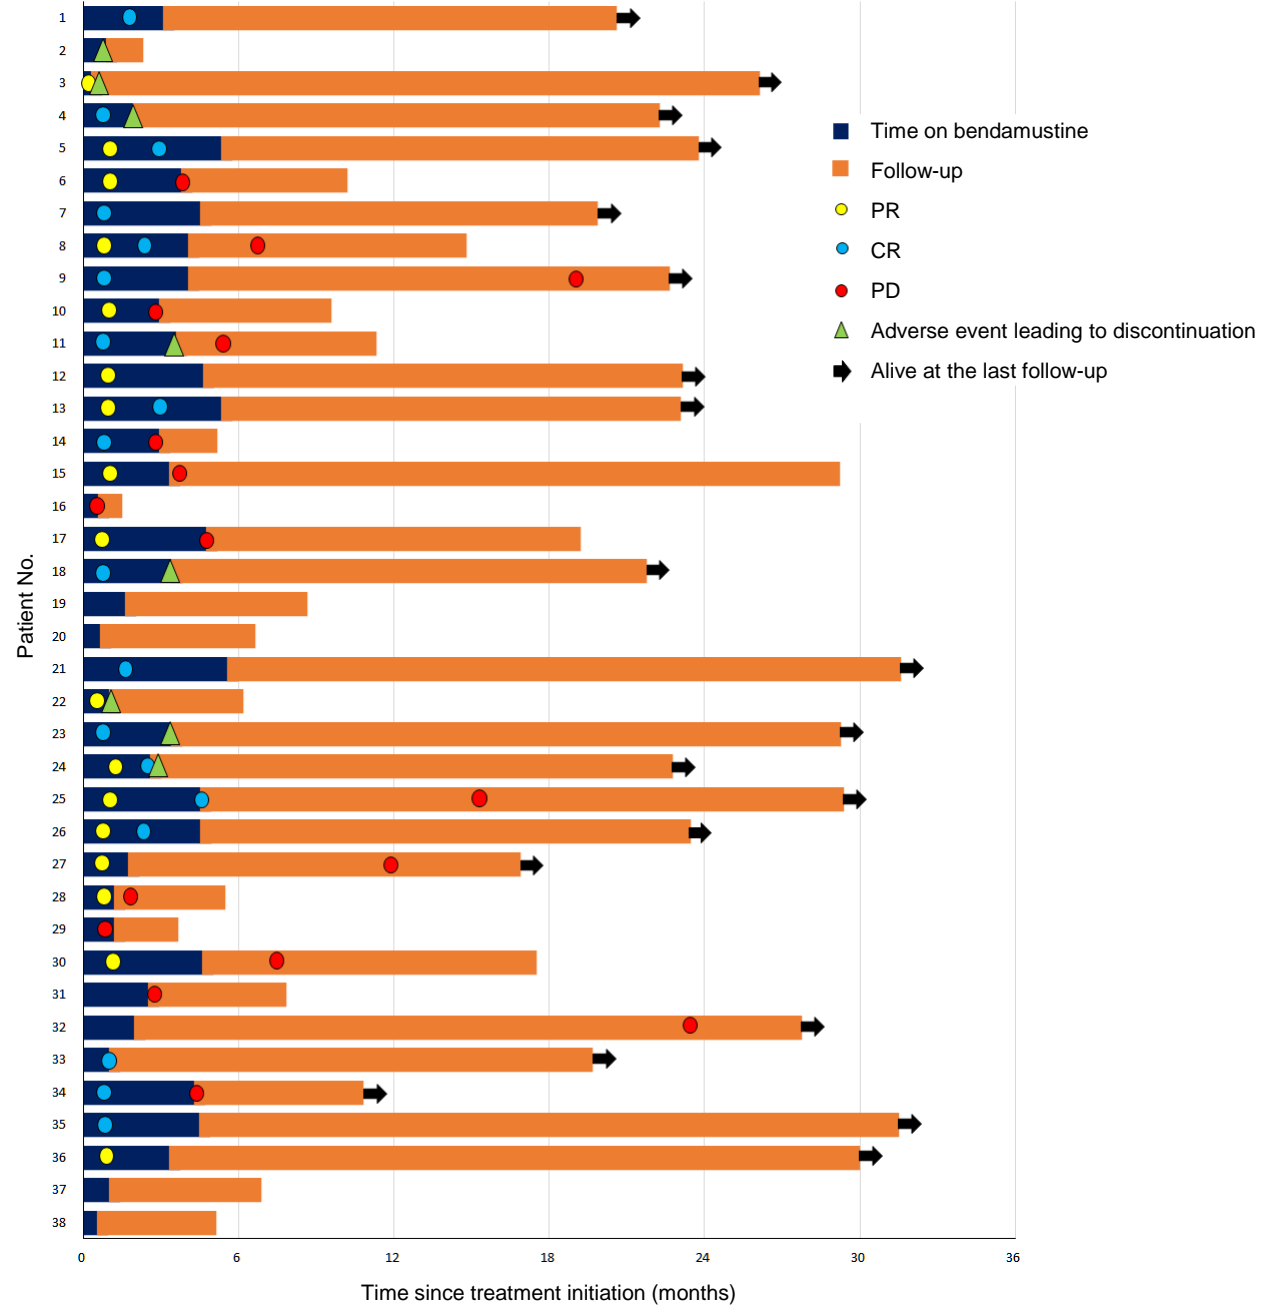

**Supplementary Table S1.** Exposure to the BR regimen.

|                                                                       | Delivered cycles: median 4 [range, 1-6] |                |           |                |                |           |
|-----------------------------------------------------------------------|-----------------------------------------|----------------|-----------|----------------|----------------|-----------|
|                                                                       | Cycle 1                                 | Cycle 2        | Cycle 3   | Cycle 4        | Cycle 5        | Cycle 6   |
| Patients who received BR, n (%)                                       | 38 (100)                                | 29 (76.3)      | 24 (63.2) | 20 (52.6)      | 15 (39.5)      | 11 (28.9) |
| Treatment delay when proceeding to the next cycle, n <sup>a</sup>     | 7                                       | 14             | 1         | 7              | 4              | –         |
| Reduction in B dose when proceeding to the next cycle, n <sup>a</sup> | 4 <sup>b</sup>                          | 8 <sup>c</sup> | 0         | 6 <sup>d</sup> | 3 <sup>e</sup> | –         |
| RDI <sup>f</sup>                                                      | Delivered cycles                        |                |           |                |                |           |
|                                                                       | Cycle 1                                 | Cycle 2        | Cycle 3   | Cycle 4        | Cycle 5        | Cycle 6   |
| n                                                                     | 38                                      | 29             | 24        | 20             | 15             | 11        |
| Mean, %                                                               | 89.4                                    | 80.1           | 82.1      | 78.1           | 69.1           | 72.5      |
| Median, %                                                             | 97.9                                    | 77.5           | 84.2      | 74.1           | 73.5           | 72.9      |
| Dose level                                                            | Delivered cycles, n                     |                |           |                |                |           |
|                                                                       | Cycle 1                                 | Cycle 2        | Cycle 3   | Cycle 4        | Cycle 5        | Cycle 6   |
| 60 mg/m <sup>2</sup>                                                  | 0                                       | 0              | 1         | 1              | 4              | 3         |
| 90 mg/m <sup>2</sup>                                                  | 0                                       | 4              | 9         | 7              | 4              | 5         |
| 120 mg/m <sup>2</sup>                                                 | 38                                      | 25             | 14        | 12             | 7              | 3         |

–: not applicable

<sup>a</sup>: Represents the number of patients in the corresponding cycle of the each raw.

<sup>b</sup>: from 120 mg/m<sup>2</sup> to 90 mg/m<sup>2</sup> for all 4 patients

<sup>c</sup>: from 120 mg/m<sup>2</sup> to 90 mg/m<sup>2</sup> for 7 patients and from 90 mg/m<sup>2</sup> to 60 mg/m<sup>2</sup> for 1 patient

<sup>d</sup>: from 120 mg/m<sup>2</sup> to 90 mg/m<sup>2</sup> for 3 patients and from 90 mg/m<sup>2</sup> to 60 mg/m<sup>2</sup> for 3 patients

<sup>e</sup>: from 120 mg/m<sup>2</sup> to 90 mg/m<sup>2</sup> for all 3 patients

<sup>f</sup>: defined as DDI/SDI × 100%

DDI: (delivered total dose, in mg/m<sup>2</sup>)/(actual time to complete chemotherapy with imputation for missed cycles, in days)

SDI: (standard total dose, in mg/m<sup>2</sup>)/(standard time to complete chemotherapy, in days)

BR, bendamustine-rituximab; RDI, relative dose intensity; DDI, delivered dose intensity; SDI, standard dose intensity

**Supplementary Table S2. Use of G-CSF by cycle in patients of the safety population**

| Short-acting G-CSF and/or Peg G-CSF |                                                                    | Short-acting G-CSF |                                                                    |                                        |                 |                           |                 |
|-------------------------------------|--------------------------------------------------------------------|--------------------|--------------------------------------------------------------------|----------------------------------------|-----------------|---------------------------|-----------------|
| Cycle                               | Number of patients who received G-CSF/number of remaining patients | Cycle              | Number of patients who received G-CSF/number of remaining patients | Number of days to administration onset |                 | Number of administration* |                 |
|                                     |                                                                    |                    |                                                                    | Median                                 | Minimum–maximum | Median                    | Minimum–maximum |
| 1                                   | 13/38                                                              | 1                  | 11/38                                                              | 15.0 (4–30)                            |                 | 5.0 (1–14)                |                 |
| 2                                   | 22/29                                                              | 2                  | 17/29                                                              | 11.0 (5–30)                            |                 | 3.0 (1–10)                |                 |
| 3                                   | 16/24                                                              | 3                  | 6/24                                                               | 9.5 (7–17)                             |                 | 4.5 (1–9)                 |                 |
| 4                                   | 15/20                                                              | 4                  | 6/20                                                               | 15.0 (8–23)                            |                 | 7.5 (1–13)                |                 |
| 5                                   | 13/15                                                              | 5                  | 5/15                                                               | 11.0 (8–26)                            |                 | 4.0 (2–10)                |                 |
| 6                                   | 9/11                                                               | 6                  | 2/11                                                               | 9.0 (8–10)                             |                 | 1.0 (1-1)                 |                 |
| Total                               | 34/38 (89.5%)                                                      | Total              | 30/38 (78.9%)                                                      |                                        |                 |                           |                 |

  

| Short-acting G-CSF and/or Peg G-CSF |                                                                                 | Peg G-CSF |                                                                        |                                        |                 |                           |                 |
|-------------------------------------|---------------------------------------------------------------------------------|-----------|------------------------------------------------------------------------|----------------------------------------|-----------------|---------------------------|-----------------|
| Cycle                               | Number of patients who received prophylactic G-CSF/number of remaining patients | Cycle     | Number of patients who received peg G-CSF/number of remaining patients | Number of days to administration onset |                 | Number of administration* |                 |
|                                     |                                                                                 |           |                                                                        | Median                                 | Minimum–maximum | Median                    | Minimum–maximum |
| 1                                   | 4/38                                                                            | 1         | 2/38                                                                   | 6.0 (5–7)                              |                 | 1 (1–1)                   |                 |
| 2                                   | 9/29                                                                            | 2         | 6/29                                                                   | 4.5 (4–7)                              |                 | 1 (1–1)                   |                 |
| 3                                   | 10/24                                                                           | 3         | 10/24                                                                  | 5.0 (4–8)                              |                 | 1 (1–2)                   |                 |
| 4                                   | 9/20                                                                            | 4         | 9/20                                                                   | 5.0 (4–7)                              |                 | 1 (1–1)                   |                 |
| 5                                   | 8/15                                                                            | 5         | 8/15                                                                   | 4.5 (4–7)                              |                 | 1 (1–2)                   |                 |
| 6                                   | 6/11                                                                            | 6         | 7/11                                                                   | 5.0 (4–14)                             |                 | 1 (1–1)                   |                 |
| Total                               | 16/38 (42.1%)                                                                   | Total     | 12/38 (31.6%)                                                          |                                        |                 |                           |                 |

\*Total of administration in each cycle

G-CSF, granulocyte colony-stimulating factor; Peg G-CSF, pegylated granulocyte colony-stimulating factor
